# Supplementary material for: Divergent and Conserved Elements Comprise the Chemoreceptive Repertoire of the Nonblood-Feeding Mosquito Toxorhynchites amboinensis
Source: PubMed Central journal article supplement — Genome Biol Evol. 2014 Oct 16;6(10):2883–96. doi: 10.1093/gbe/evu231 (PMC4224357; doi:10.1093/gbe/evu231), 2014-10-16
Supplement: supp_evu231_Supplementary_figures.pdf [file supp_evu231_Supplementary_figures.pdf]

## Supplementary Figure Legends:

**Figure S1. The complexity of the *de novo* transcriptome assembly of *T. amboinensis*.** (A) Distribution of the number of transcripts (isoforms) in each sub-component of the *de novo* transcriptome assembly. (B) Distribution of the number of protein-coding genes annotated on each transcript.

**Figure S2. Expression levels of “conserved”, “orphan” and transposon-coding genes *T. amboinensis* chemosensory appendages and whole body samples.** In the box-plot, red, green, and blue colors indicate “conserved” genes (i.e. genes with homolog in the NR database), “orphan” genes (i.e. genes without homolog in the NR database), and transposon-coding genes, respectively. The RPKM value was used as the measurement of gene expression level.

**Figure S3. Distribution of single-gene trees supporting alternative placements of *T. amboinensis* in the mosquito phylogeny.** Blue: gene trees supporting a sister relationship between *T. amboinensis* and *Ae. aegypti*; orange: gene trees supporting a sister relationship between *T. amboinensis* and *C. quinquefasciatus*; grey: gene trees supporting a basal position of *T. amboinensis* to the grouping of *Ae. aegypti* and *C. quinquefasciatus*.

**Figure S4. Gene tree for the GRs of four mosquito species.** Phylogeny of the GR-family of chemoreceptors with branches color coded by the respective species. The heat maps at the branch tips represent the RPKM-percent composition of each GR family member within the maxillary palp of the three species whose expression was profiled in this study. The gene family members from *C. quinquefasciatus* are included here for phylogenetic reference, but no transcriptome profile for this species was available.

**Figure S5. Maximum likelihood tree with length of the ORs of four mosquito species.** Phylogeny of the OR-family of chemoreceptors with branches color coded by the respective species. ML tree is based upon amino acid sequence.

**Figure S6 Maximum likelihood tree with length of the GRs of four mosquito species.** Phylogeny of the GR-family of chemoreceptors with branches color coded by the respective species. ML tree is based upon amino acid sequence

**Figure S7. Maximum likelihood tree with length of the IRs of four mosquito species.** Phylogeny of the IR-family of chemoreceptors with branches color coded by the respective species. ML tree is based upon amino acid sequence

Figure S1

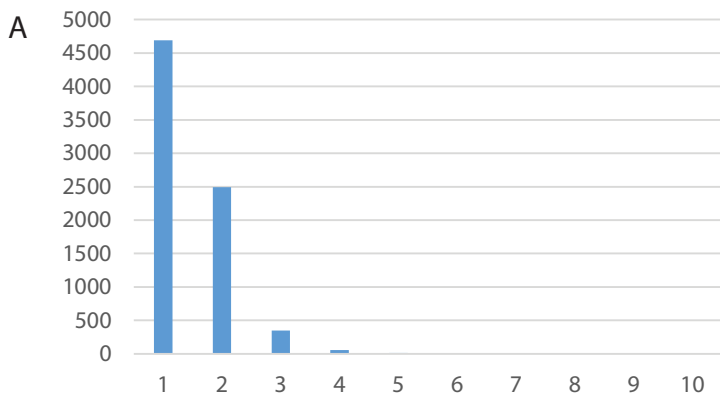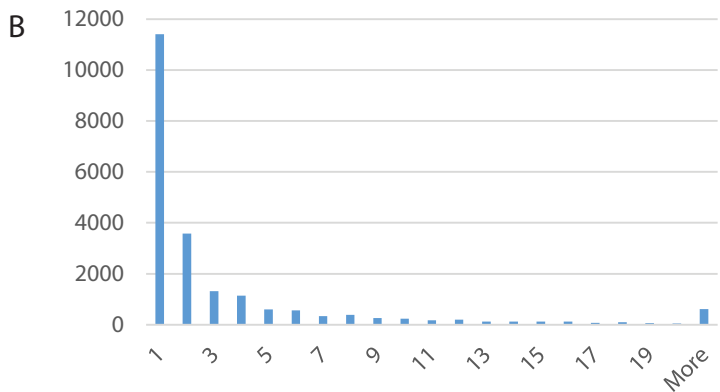

Figure S2

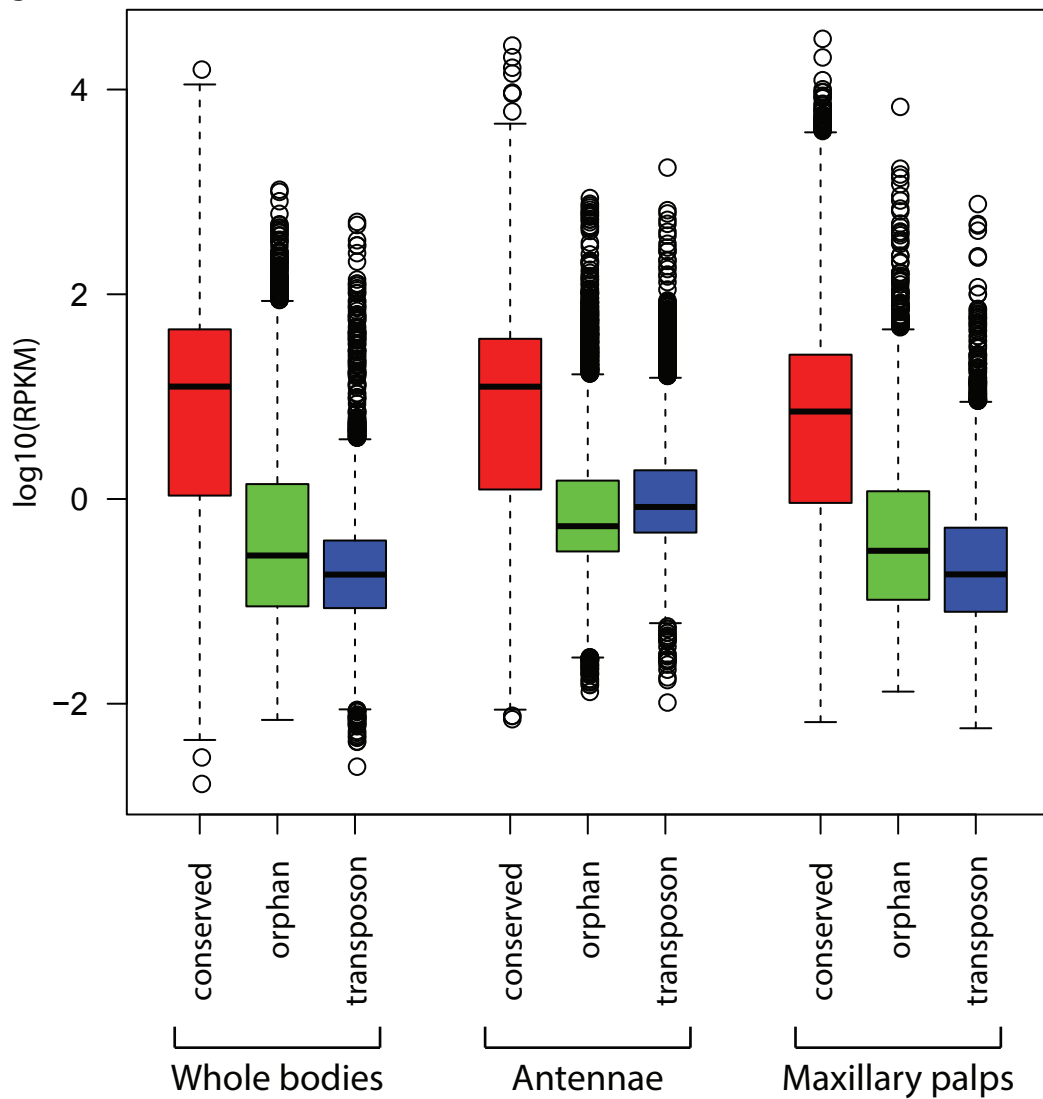

Figure S3

Number of single-gene trees supporting alternative phylogenetic positions of *T. amboinensis*

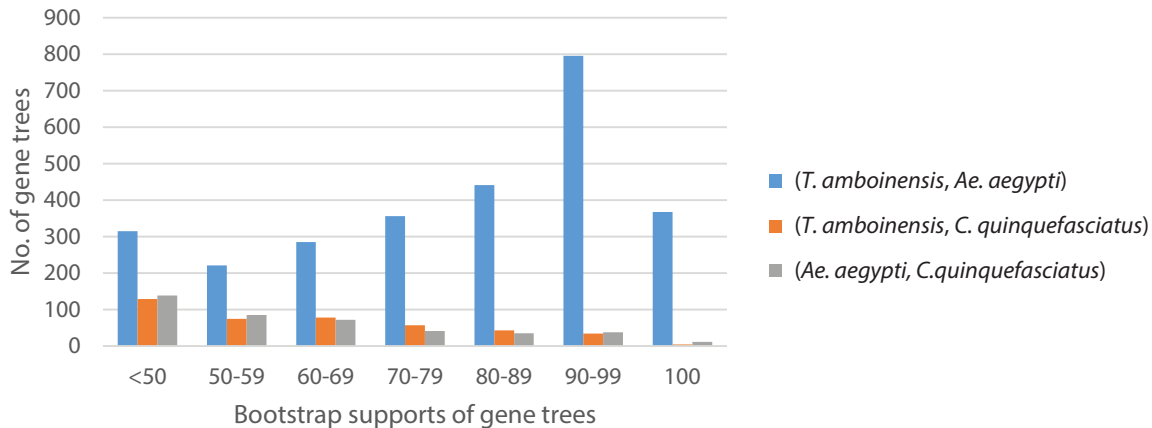



- *An. gambiae*
- *C. quinquefasciatus*
- *Ae. aegypti*
- *T. amboinensis*

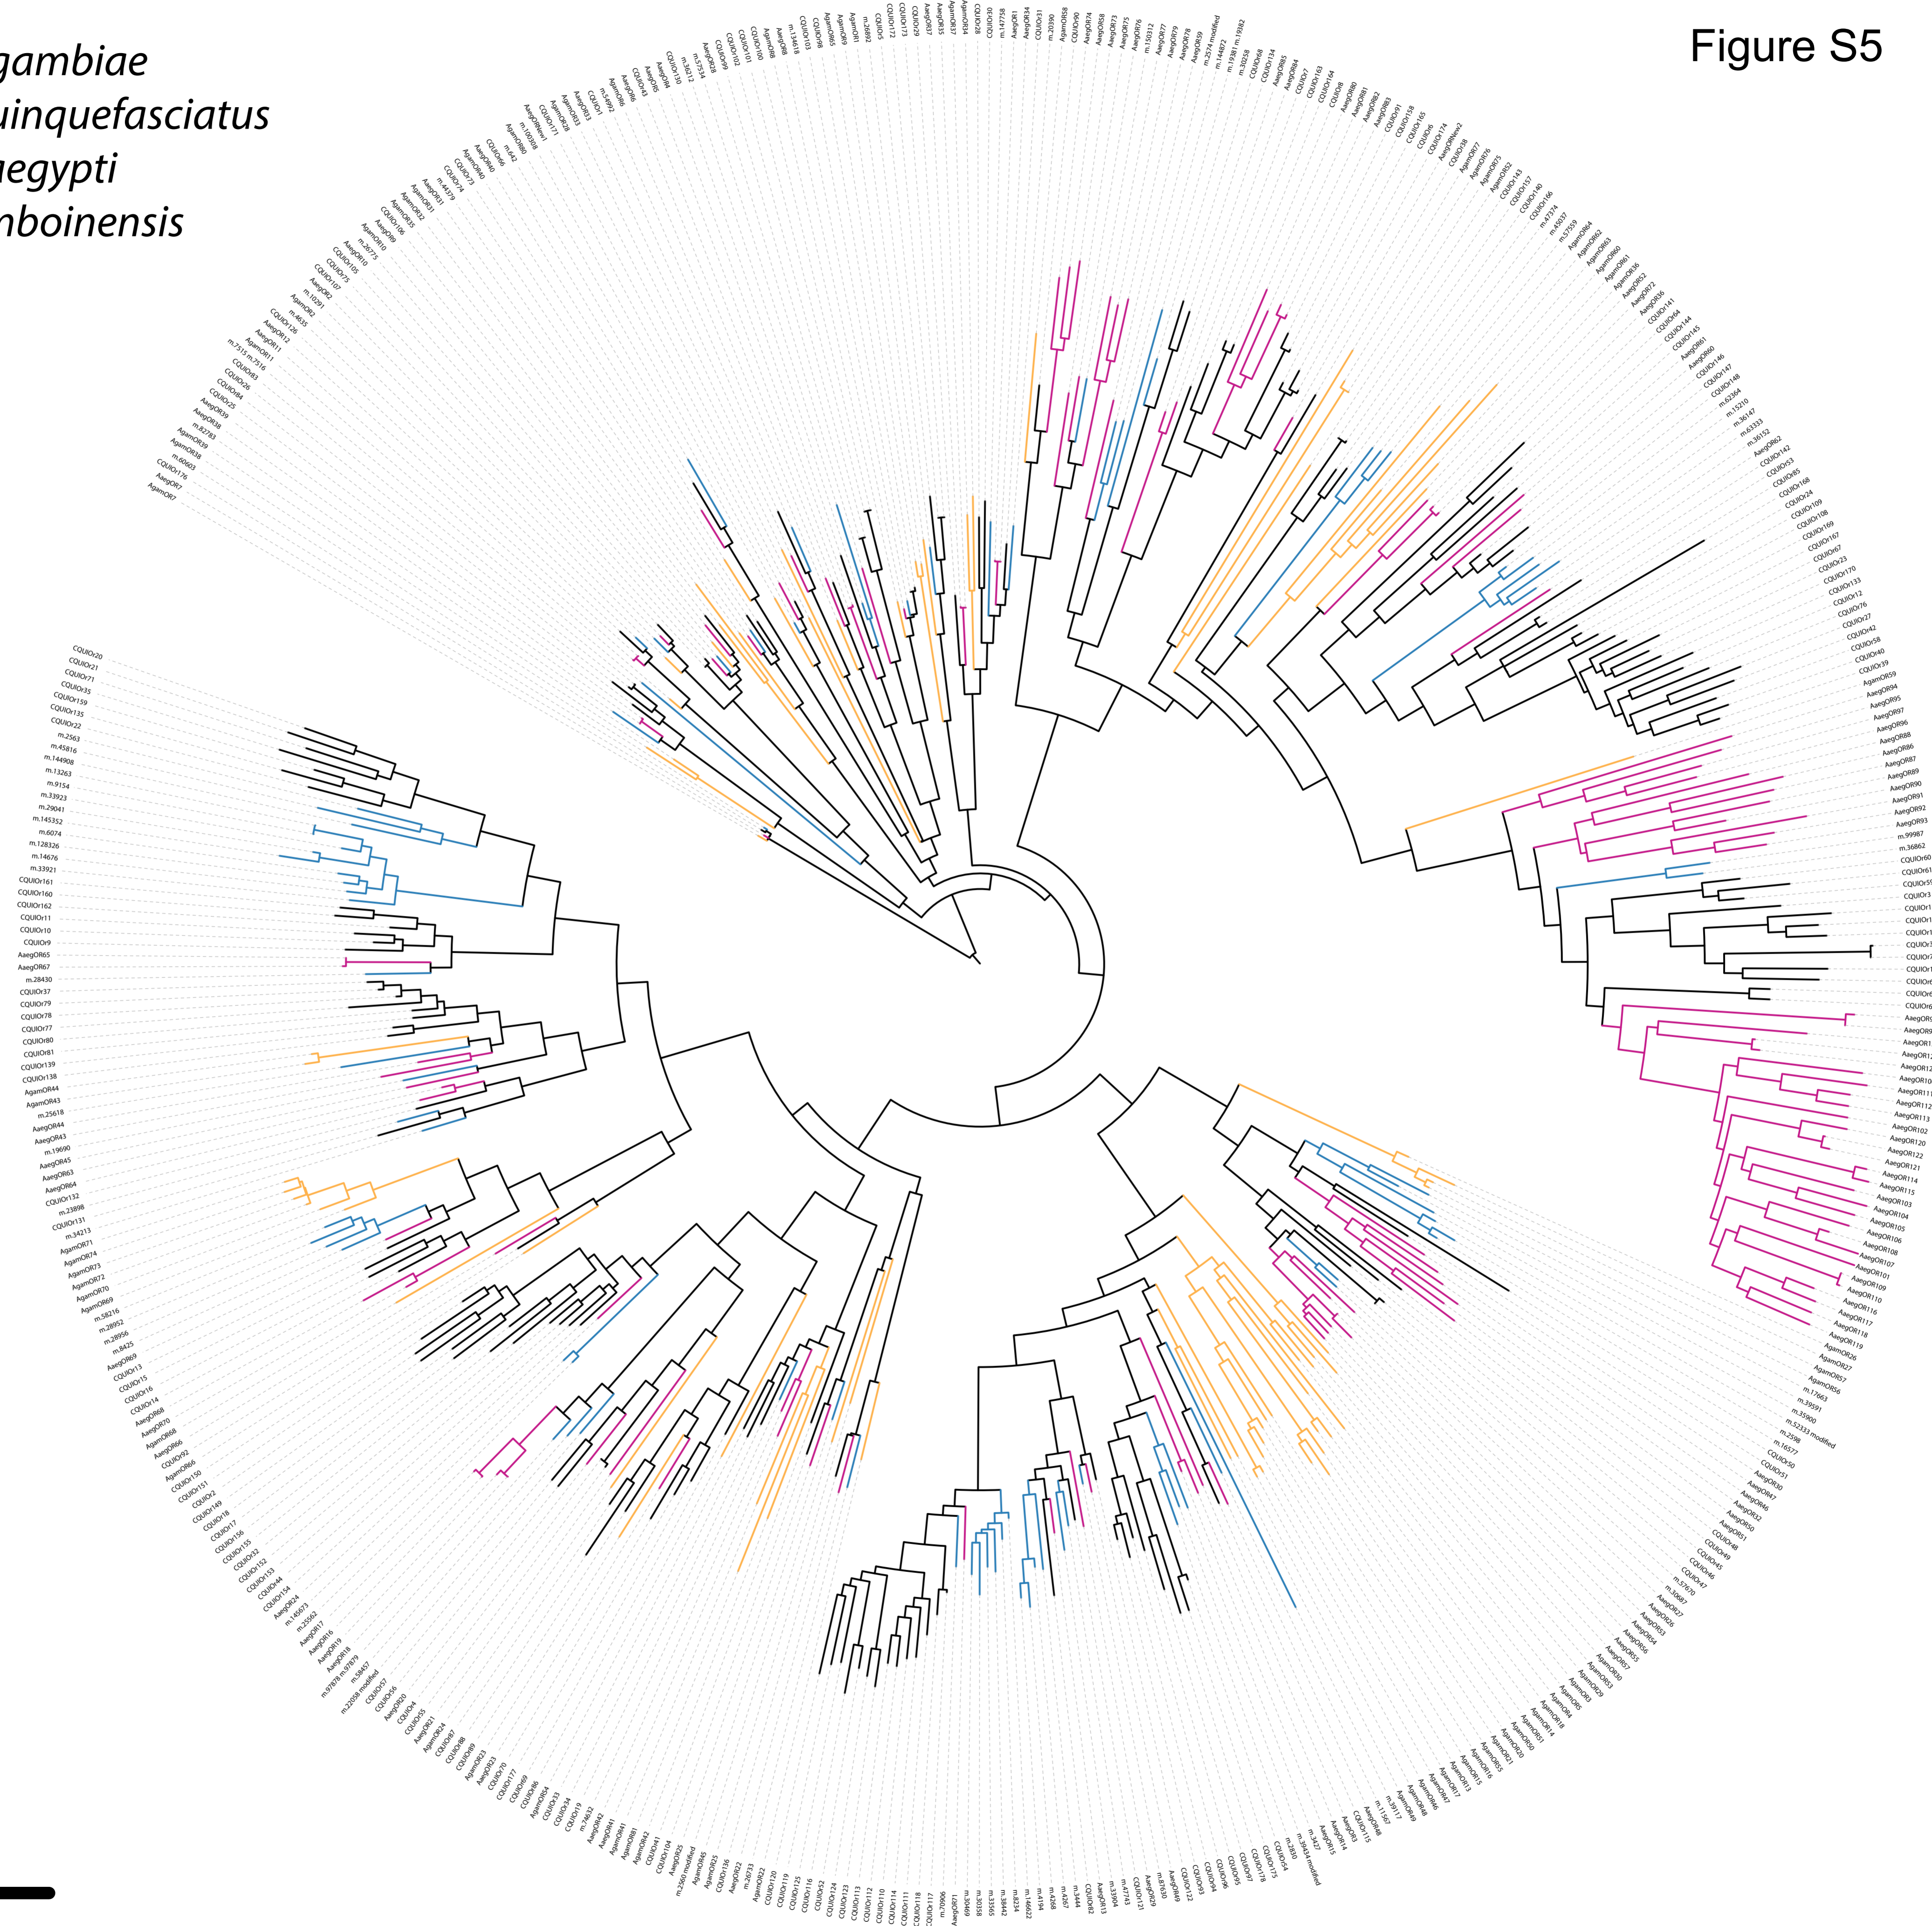

Figure S6

 *An. gambiae*  
 *C. quinquefasciatus*  
 *Ae. aegypti*  
 *T. amboinensis*

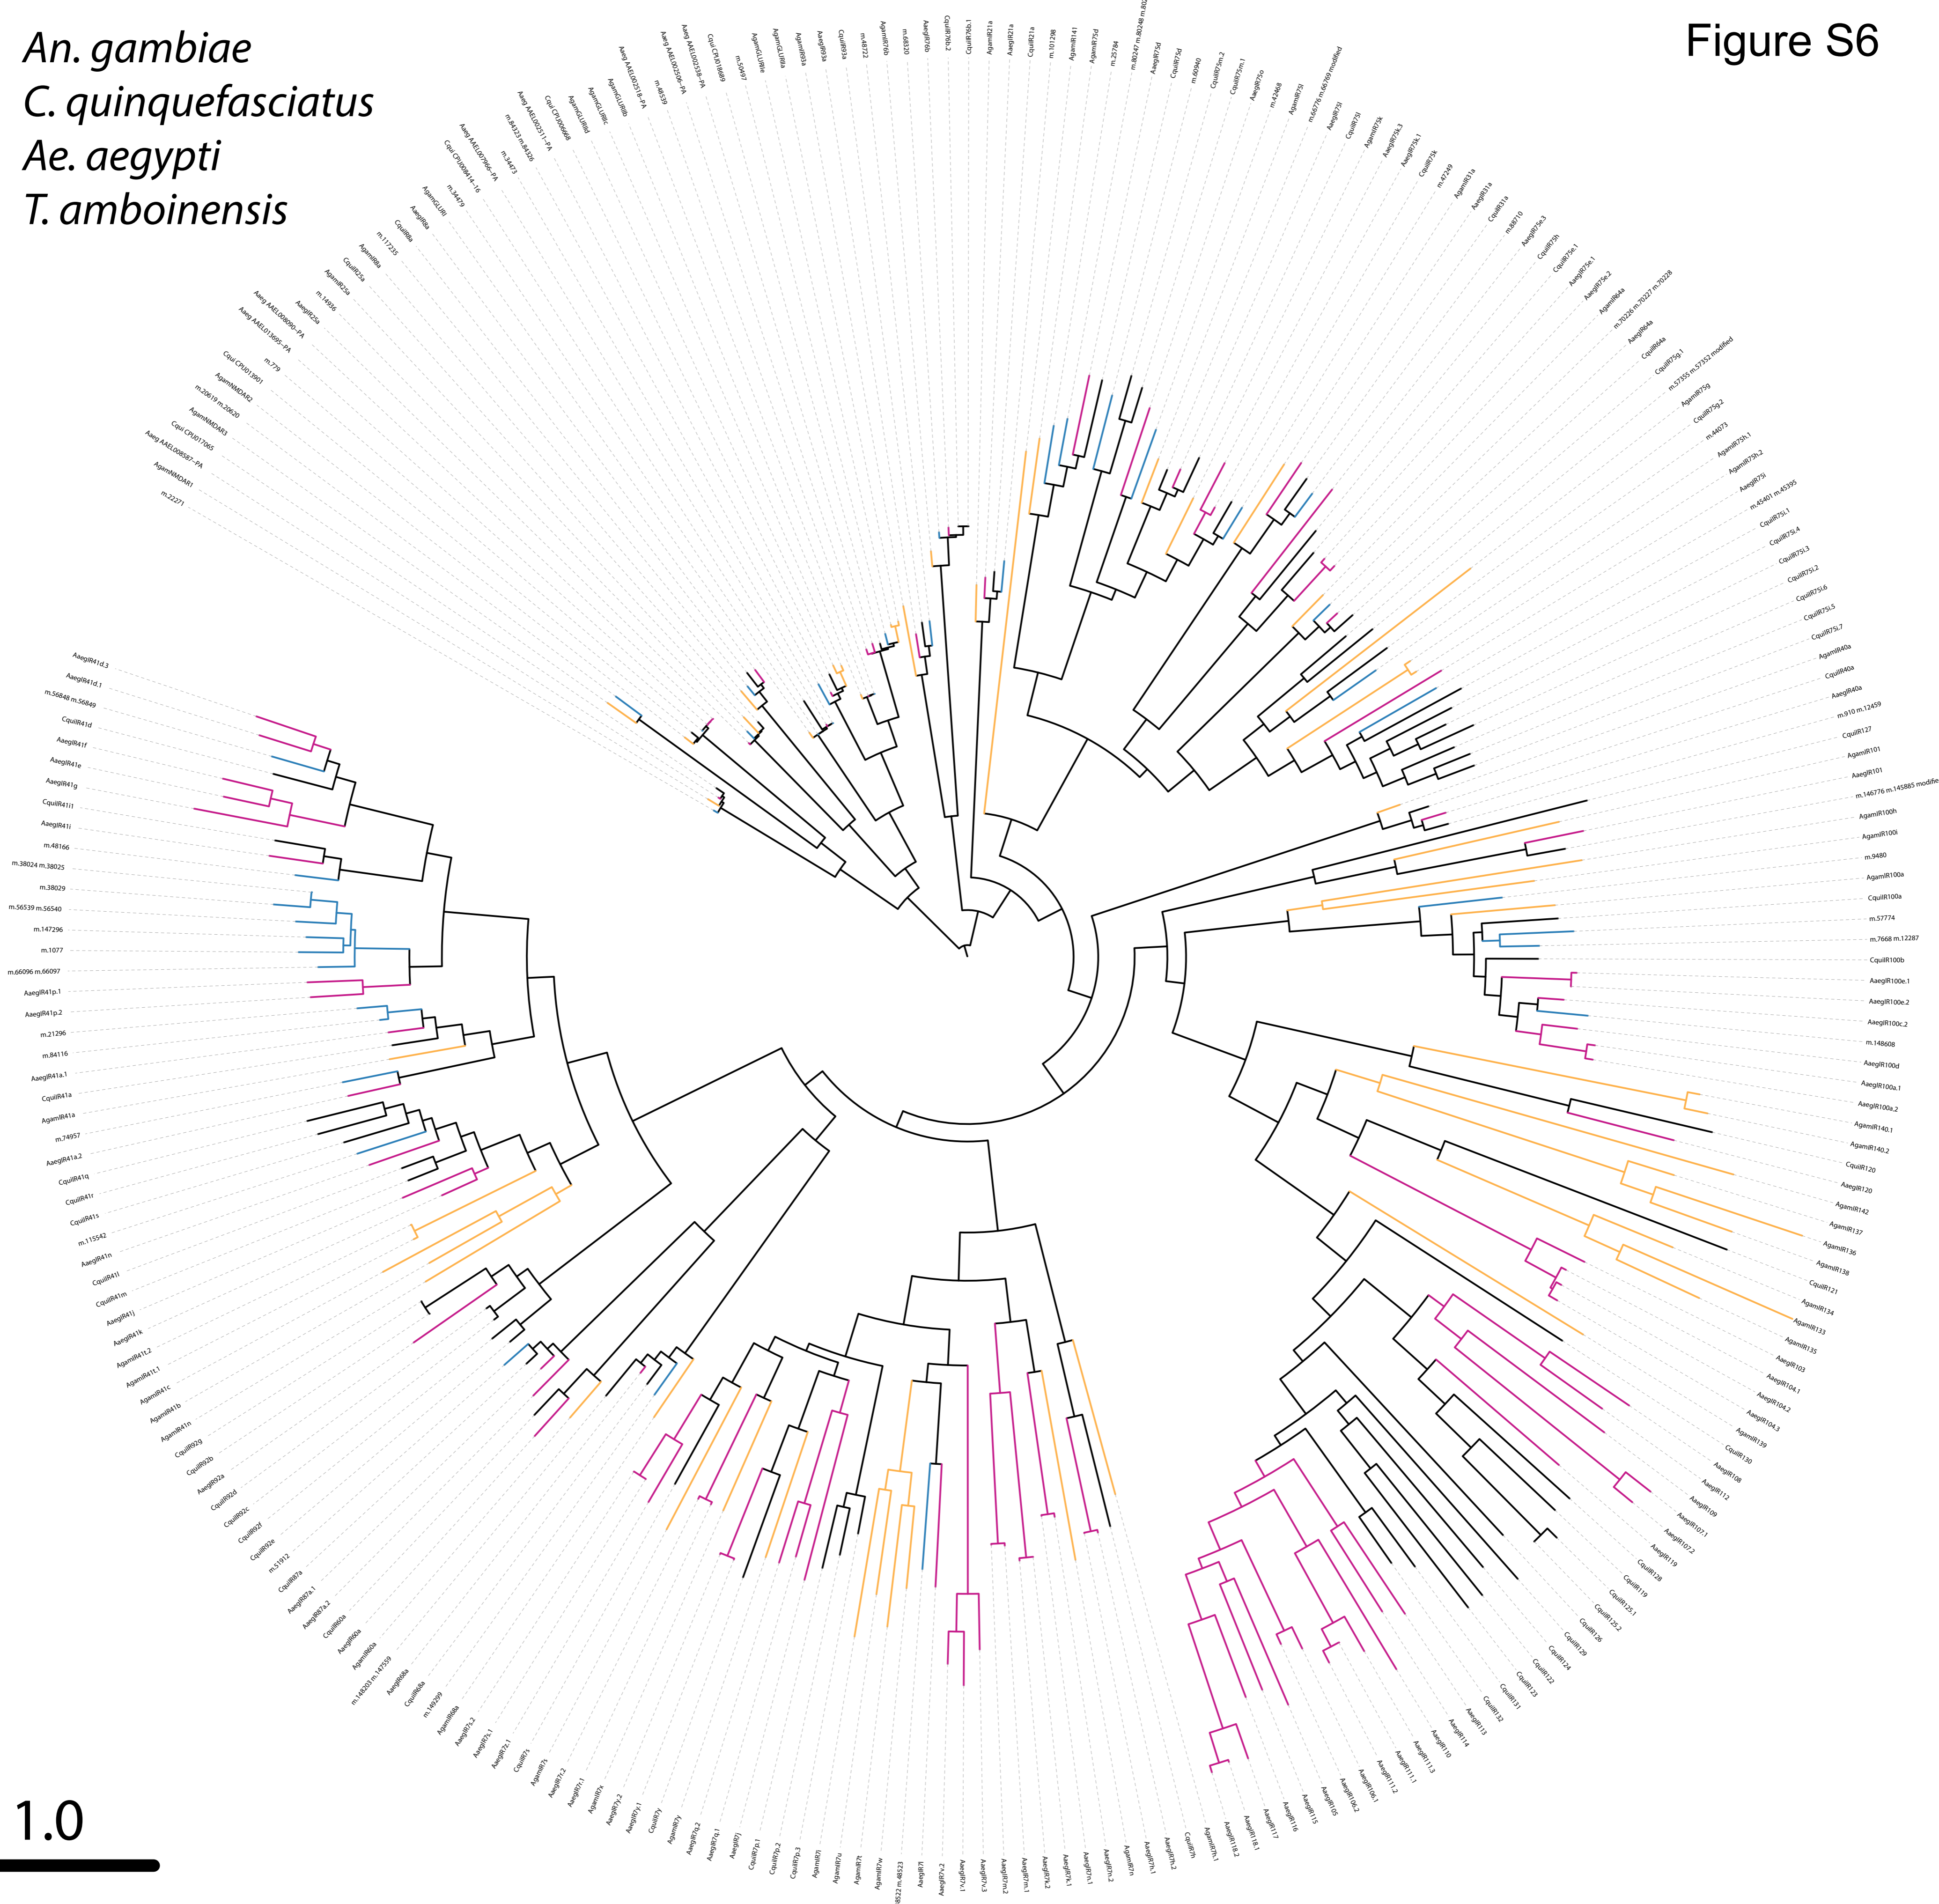

1.0



Figure S7

- *An. gambiae*
- *C. quinquefasciatus*
- *Ae. aegypti*
- *T. amboinensis*

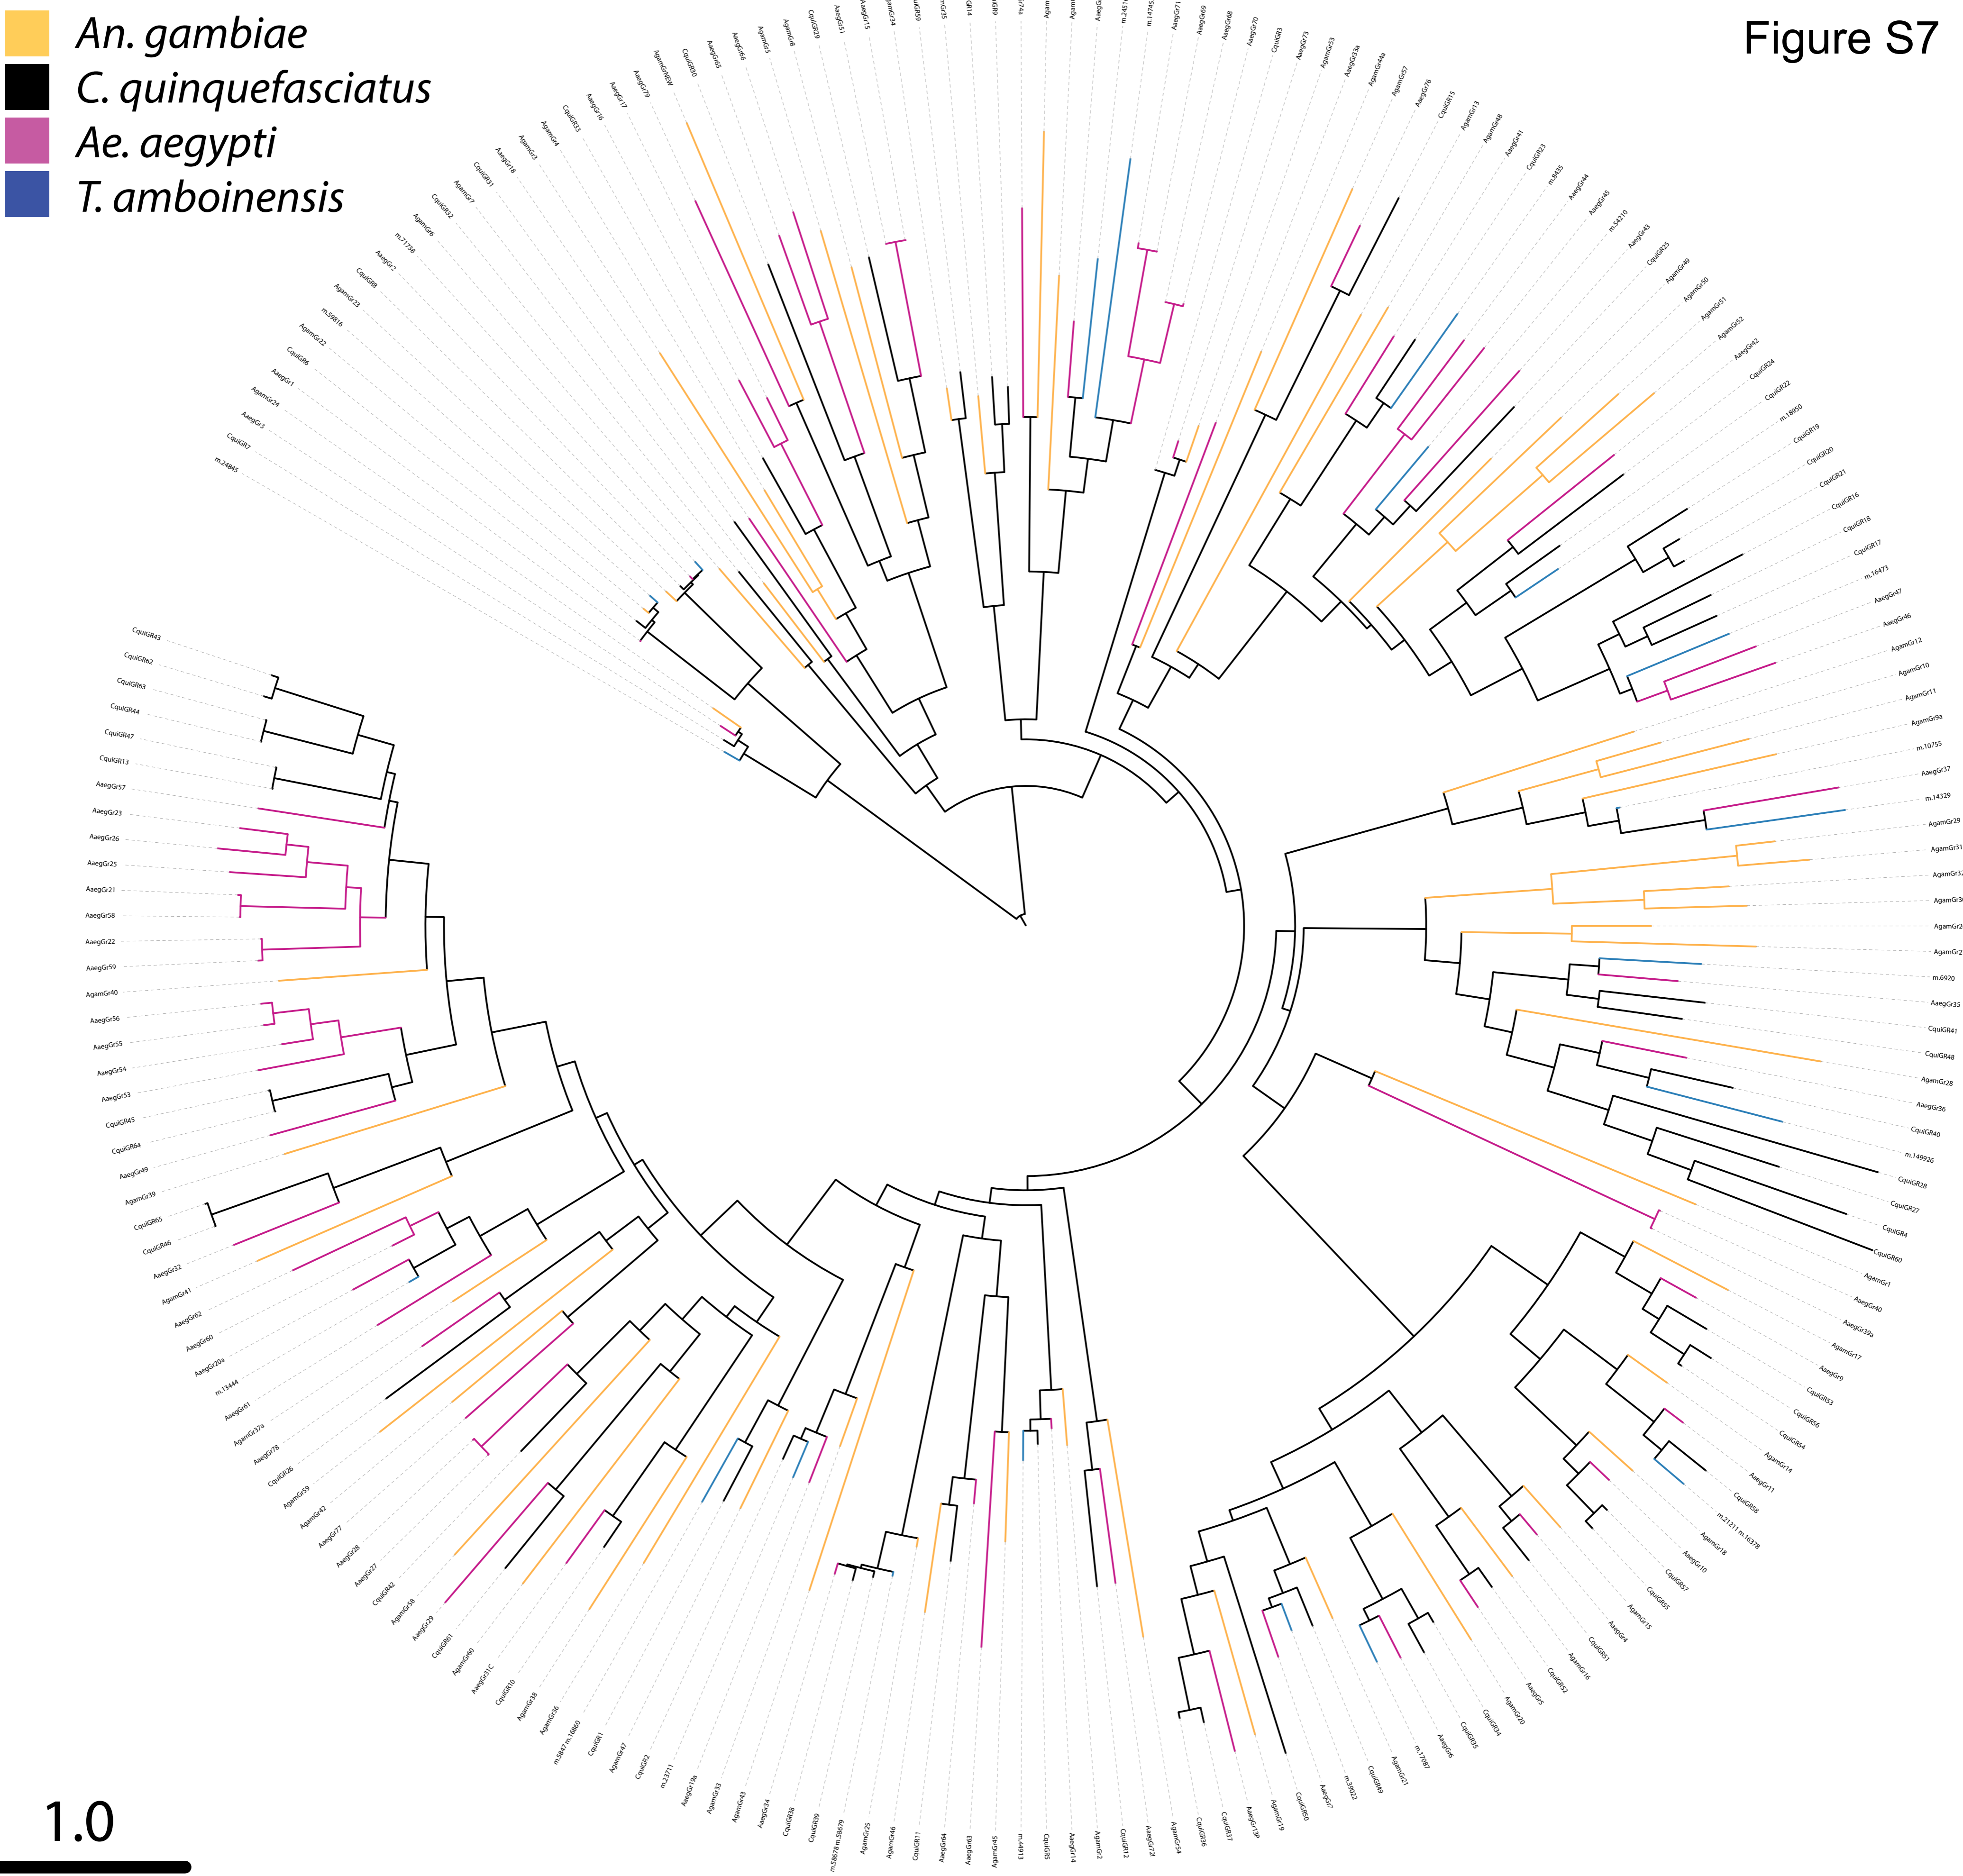

1.0
